# Supplementary material for: PeTMbase: A Database of Plant Endogenous Target Mimics (eTMs)
Source: PubMed Central journal article supplement (PMC5148581; doi:10.1371/journal.pone.0167698), 2016-12-09
Supplement: pone.0167698.s001.pdf [file pone.0167698.s001.pdf]

**S1 Table.** SRA data sets utilized for the identification of novel lncRNA sequences.

| <b>Species</b>                 | <b>SRA ID</b> | <b>Library type</b> | <b>Library size (bases)</b> | <b>Platform</b>             |
|--------------------------------|---------------|---------------------|-----------------------------|-----------------------------|
| <i>Arabidopsis thaliana</i>    | ERR754084     | PE*                 | 3.6G                        | Illumina HiSeq 2000         |
| <i>Brachypodium distachyon</i> | DRR048605     | SE**                | 2.9G                        | Illumina HiSeq 2000         |
| <i>Glycine max</i>             | SRR3475914    | PE                  | 2.7G                        | Illumina HiSeq 2000         |
|                                | SRR2079642    | SE                  | 9.7G                        | Illumina HiSeq 2000         |
|                                | SRR1592302    | PE                  | 3.5G                        | Illumina HiSeq 2500         |
| <i>Hordeum vulgare</i>         | ERR674189     | PE                  | 3.4G                        | Illumina HiSeq 1000         |
| <i>Medicago truncatula</i>     | SRR1523070    | PE                  | 9.6G                        | Illumina HiSeq 2000         |
|                                | SRR1523072    | PE                  | 9.5G                        | Illumina HiSeq 2000         |
|                                | SRR1523077    | PE                  | 9.1G                        | Illumina HiSeq 2000         |
| <i>Oryza sativa</i>            | SRR952242     | PE                  | 3.2G                        | Illumina Genome Analyzer II |
|                                | ERR687857     | PE                  | 3.2G                        | Illumina HiSeq 2000         |
| <i>Populus trichocarpa</i>     | SRR1030352    | PE                  | 11.8G                       | Illumina HiSeq 2000         |
| <i>Sorghum bicolor</i>         | ERR886716     | PE                  | 4.7G                        | Illumina HiScanSQ           |

|                             |            |    |       |                              |
|-----------------------------|------------|----|-------|------------------------------|
| <i>Solanum lycopersicum</i> | SRR2923343 | PE | 5.9G  | Illumina HiSeq 2000          |
|                             | SRR3095793 | PE | 1.9G  | Illumina HiSeq 2000          |
| <i>Triticum aestivum</i>    | SRR1542404 | PE | 16.3G | Illumina HiSeq 2000          |
|                             | SRR1542405 | PE | 15.2G | Illumina HiSeq 2000          |
|                             | SRR2306548 | PE | 5.5G  | Illumina HiSeq 2500          |
|                             | SRR1228254 | PE | 3.7G  | Illumina HiSeq 2000          |
| <i>Zea mays</i>             | SRR2069900 | PE | 5.4G  | Illumina HiSeq 2500          |
|                             | SRR762350  | SE | 6.9G  | Illumina Genome Analyzer IIx |

\*PE: Paired end, \*\*SE: Single end
