# Supplementary material for: PeTMbase: A Database of Plant Endogenous Target Mimics (eTMs)
Source: PubMed Central journal article supplement (PMC5148581; doi:10.1371/journal.pone.0167698), 2016-12-09
Supplement: pone.0167698.s002.pdf [file pone.0167698.s002.pdf]

**S2 Table.** Reference genome assemblies utilized for short read mapping and alignment statistics associated with the transcriptome libraries.

| Reference Assembly                  | SRA ID     | Number of input reads | Average input read length | Mapped reads % |
|-------------------------------------|------------|-----------------------|---------------------------|----------------|
| <i>A. thaliana</i> - TAIR10         | ERR754084  | 17789212              | 202                       | 79.16          |
| <i>B. distachyon</i> - v1.0         | DRR048605  | 29269012              | 202                       | 91.11          |
| <i>G. max</i> - V1.0                | SRR3475914 | 17397088              | 202                       | 94.07          |
|                                     | SRR2079642 | 30643459              | 100                       | 91.53          |
|                                     | SRR1592302 | 26749369              | 100                       | 95.16          |
| <i>H. vulgare</i> - ASM32608v1      | ERR674189  | 16791756              | 200                       | 64.67          |
| <i>M. truncatula</i> - MedtrA17_4.0 | SRR1523070 | 47999588              | 200                       | 86.38          |
|                                     | SRR1523072 | 47434133              | 200                       | 88.18          |
|                                     | SRR1523077 | 45585568              | 200                       | 88.72          |
| <i>Oryza sativa</i> - IRGSP-1.0     | SRR952242  | 15874767              | 202                       | 95.98          |

|                                    |            |          |     |       |
|------------------------------------|------------|----------|-----|-------|
|                                    | ERR687857  | 15781946 | 202 | 82.51 |
| <i>P. trichocarpa</i> - JGI2.0     | SRR1030352 | 65442430 | 180 | 96.45 |
| <i>S. bicolor</i> - Sorbi1         | ERR886716  | 23431944 | 202 | 94.83 |
| <i>S. lycopersicum</i> - SL2.50    | SRR2923343 | 29643874 | 200 | 84.47 |
|                                    | SRR3095793 | 18881356 | 100 | 98.03 |
| <i>T. aestivum</i> - IWGSC1+popseq | SRR1542404 | 18110600 | 202 | 90.96 |
|                                    | SRR1542405 | 81331219 | 200 | 91.34 |
|                                    | SRR2306548 | 76134375 | 200 | 93.70 |
|                                    | SRR1228254 | 27518448 | 200 | 86.36 |
| <i>Z. mays</i> - AGPv3             | SRR2069900 | 59966193 | 35  | 68.80 |
|                                    | SRR762350  | 26544807 | 202 | 96.13 |
